# Supplementary material for: Circulating Cancer Stem Cell-Derived Extracellular Vesicles as a Novel Biomarker for Clinical Outcome Evaluation
Source: Hindawi journal article supplement (doi:10.1155/2019/5879616), 2019-11-18
Supplement: f1 [file 5879616.f1.pdf]

**Supplementary Table 1. Patient characteristics**

| Variable                   | Cancer Patients   |            | Healthy Controls |            | p-value<br>(Fisher's<br>Exact Test) |
|----------------------------|-------------------|------------|------------------|------------|-------------------------------------|
|                            | Number<br>(n=106) | Percentage | Number<br>(n=25) | Percentage |                                     |
| <b>Age</b>                 |                   |            |                  |            |                                     |
| >65                        | 63                | 59.4       | 13               | 52         | 0.51                                |
| ≤65                        | 43                | 40.6       | 12               | 48         |                                     |
| <b>Sex</b>                 |                   |            |                  |            |                                     |
| Male                       | 73                | 68.9       | 13               | 52         | 0.16                                |
| Female                     | 33                | 31.3       | 12               | 48         |                                     |
| <b>Primary Cancer Site</b> |                   |            |                  |            |                                     |
| Lung                       | 51                | 48.1       |                  |            |                                     |
| Colon/Rectum               | 30                | 28.3       |                  |            |                                     |
| Breast                     | 7                 | 6.6        |                  |            |                                     |
| Other*                     | 18                | 17.0       |                  |            |                                     |
| <b>Cancer Treatment</b>    |                   |            |                  |            |                                     |
| Chemotherapy               | 50                | 47.2       |                  |            |                                     |
| Immunotherapy              | 22                | 20.8       |                  |            |                                     |
| Anti-angiogenetic therapy  | 19                | 17.9       |                  |            |                                     |
| Anti-EGFR therapy          | 9                 | 8.5        |                  |            |                                     |
| Hormonal therapy           | 3                 | 2.8        |                  |            |                                     |
| Other                      | 3                 | 2.8        |                  |            |                                     |
| <b>Line of therapy</b>     |                   |            |                  |            |                                     |
| 1                          | 69                | 65.1       |                  |            |                                     |
| 2                          | 26                | 24.5       |                  |            |                                     |
| ≥3                         | 11                | 10.3       |                  |            |                                     |

\* This group included 4 patients affected by melanoma, 4 patients affected by bladder cancer, 3 patients affected by kidney cancer, 2 patients with pancreatic adenocarcinoma, 2 patients with ovarian cancer, 1 patient affected by hepatocellular carcinoma and 1 patient affected by cholangio-carcinoma.

**Supplementary Table 2. Survival analysis.**

| <b>Parameter</b>       | <b>Patients</b> | <b>Cut off (ROC curves)</b> | <b>Hazard ratio</b> | <b>Median OS</b> | <b>p-value</b> |
|------------------------|-----------------|-----------------------------|---------------------|------------------|----------------|
| <b>Age</b>             | 106             |                             | 1.00 (0.98-1.03)    |                  | 0.70           |
| <b>Sex</b>             | 106             |                             | 0.37 (0.19-0.68)    |                  | <b>0.002</b>   |
| <b>Total EVs</b>       | 106             |                             | 1.36 (0.81-2.30)    |                  | 0.25           |
|                        |                 | <11886                      |                     | 16.0 (NE-NE)     | 0.23           |
|                        |                 | >11886                      |                     | 10.0 (3.5-16.5)  |                |
| <b>CD31+EVs</b>        | 81              |                             | 1.55 (0.83-2.88)    |                  | 0.16           |
|                        |                 | <120                        |                     | 19.0 (5.0-33.0)  | 0.15           |
|                        |                 | >120                        |                     | 10.0 (6.3-13.7)  |                |
| <b>CD133+CD326-EVs</b> | 104             |                             | 2.79 (1.51-5.17)    |                  | <b>0.001</b>   |
|                        |                 | <118.5                      |                     | NR (3.0-NE)      | <b>0.0004</b>  |
|                        |                 | >118.5                      |                     | 8.0 (6.6-9.4)    |                |
| <b>Lung Cancer</b>     | 51              |                             | 2.60 (1.26-5.37)    |                  | <b>0.01</b>    |
|                        |                 | <148.5                      |                     | 16.0 (6.6-25.4)  | <b>0.006</b>   |
|                        |                 | >148.5                      |                     | 5.0 (0.2-9.8)    |                |
| <b>Colon Cancer</b>    | 29              |                             | 2.61 (0.72-9.42)    |                  | 0.14           |
|                        |                 | <78.5                       |                     | 19.0 (NE-NE)     | 0.11           |
|                        |                 | >78.5                       |                     | 10.0 (4.1-16.0)  |                |

**Supplementary Table 3. Univariate Analysis of CD133+CD326- EVs.**

| Parameter                          | Threshold | Patients | Median (CI 95%)   | p-value |
|------------------------------------|-----------|----------|-------------------|---------|
| <b>Total cancer patient cohort</b> |           |          |                   |         |
| <b>Age</b>                         |           |          |                   | 0.761   |
|                                    | <118.5    | 68       | 68.0 (45.4-82.1)  |         |
|                                    | >118.5    | 36       | 68.0 (47.9-81.6)  |         |
| <b>Sex</b>                         |           |          |                   | 1.000   |
| <b>male</b>                        | <118.5    | 51       |                   |         |
| <b>female</b>                      |           | 17       |                   |         |
| <b>male</b>                        | >118.5    | 27       |                   |         |
| <b>female</b>                      |           | 9        |                   |         |
| <b>Lung Cancer</b>                 |           |          |                   |         |
| <b>Age</b>                         |           |          |                   | 0.797   |
|                                    | <148.5    | 33       | 70.0 (48.0-81.0)  |         |
|                                    | >148.5    | 18       | 69.5 (42.4.-80.3) |         |
| <b>Sex</b>                         |           |          |                   | 0.916   |
| <b>male</b>                        | <148.5    | 29       |                   |         |
| <b>female</b>                      |           | 4        |                   |         |
| <b>male</b>                        | >148.5    | 16       |                   |         |
| <b>female</b>                      |           | 2        |                   |         |

**Supplementary Table 4. Clinical benefit rate evaluated according to CD133+CD326-EV concentrations.**

| Group                              | Threshold | Percentage % | Odd Ratio (CI 95%) | p-value       |
|------------------------------------|-----------|--------------|--------------------|---------------|
| <b>Total cancer patient cohort</b> |           |              |                    |               |
| <b>Responders (n=57)</b>           | <148.5    | 59.6 (n=34)  | 1.83 (1.30-13.8)   | <b>0.0003</b> |
|                                    | >148.5    | 40.4 (n=23)  |                    |               |
| <b>Non-Responders (n=37)</b>       | <148.5    | 21.6 (n=8)   | 0.34 (0.18-0.67)   | <b>0.0003</b> |
|                                    | >148.5    | 78.4 (n=29)  |                    |               |
| <b>Lung Cancer</b>                 |           |              |                    |               |
| <b>Responders (n=26)</b>           | <148.5    | 69.2 (n=18)  | 2.44 (2.08-28.0)   | <b>0.002</b>  |
|                                    | >148.5    | 30.8 (n=8)   |                    |               |
| <b>Non-Responders (n=22)</b>       | <148.5    | 22.7 (n=5)   | 0.32 (0.14-0.73)   | <b>0.002</b>  |
|                                    | >148.5    | 77.3 (n=17)  |                    |               |

**Supplementary Table 5. Baseline EV concentrations in cancer patients.**

| Patients | Total EVs | Leuko EVs | CD31+ EVs | CD90+CD29- EVs | CD90-CD29+ EVs | CD90+CD29+ EVs | CD326-CD133+ EVs | CD326+CD133+ EVs | CD326+CD133- EVs |
|----------|-----------|-----------|-----------|----------------|----------------|----------------|------------------|------------------|------------------|
| 1        | 11702,2   | 63,9      | 118,7     | 28,0           | 25,2           | 5,6            | 60,4             | 2,7              | 82,4             |
| 2        | 33216,8   | 607,9     | 1377,9    | 10775,8        | 12,7           | 496,4          | 1449,7           | 13,5             | 171,6            |
| 3        | 6650,0    | NE        | NE        | 43,4           | 347,2          | 23,8           | 37,8             | 224,0            | 896,0            |
| 4        | 12030,9   | 112,6     | 1183,9    | 142,9          | 52,5           | 35,0           | 283,0            | 0,0              | 252,6            |
| 5        | 9600,4    | 41,7      | 163,8     | 457,7          | 16,2           | 43,1           | 373,3            | 7,8              | 129,6            |
| 6        | 101960,6  | NE        | NE        | 42,0           | 259,0          | 91,0           | 623,0            | 716,8            | 140,0            |
| 7        | 34086,8   | 458,2     | 585,5     | 320,8          | 11,7           | 11,7           | 183,9            | 2,7              | 0,0              |
| 8        | 18727,9   | 75,8      | 166,3     | 126,0          | 129,5          | 49,0           | 194,9            | 68,6             | 592,9            |
| 9        | 15421,3   | 158,3     | 313,5     | 163,8          | 100,4          | 39,6           | 215,2            | 0,0              | 18,1             |
| 10       | 16744,0   | 630,0     | 70,0      | 1499,4         | 16,8           | 215,6          | 123,2            | 268,8            | 554,4            |
| 11       | 18282,0   | 276,6     | 225,4     | 5870,8         | 0,3            | 0,0            | 0,0              | 0,0              | 10,2             |
| 12       | 9193,8    | 655,2     | 5,2       | 728,0          | 3057,6         | 196,0          | 26,6             | 201,6            | 569,8            |
| 13       | 21148,4   | 103,6     | 526,4     | 4104,8         | 36,4           | 100,8          | 271,3            | 0,0              | 26,3             |
| 14       | 7149,8    | NE        | NE        | 0,0            | 1358,0         | 404,6          | 51,8             | 191,8            | 1134,0           |
| 15       | 4253,2    | NE        | NE        | 29,4           | 560,0          | 154,0          | 14,0             | 197,4            | 695,8            |
| 16       | 16573,2   | 264,6     | 93,8      | 26,6           | 263,2          | 86,8           | 16,8             | 0,0              | 49,0             |
| 17       | 3754032,8 | 789,6     | 56,0      | 2771,2         | 229,6          | 324,8          | 655,2            | 95,2             | 929,6            |
| 18       | 8047,2    | 589,4     | 215,6     | 590,8          | 0,0            | 61,6           | 492,8            | 310,8            | 642,6            |
| 19       | 10838,8   | 134,4     | 873,6     | 16,8           | 543,2          | 105,0          | 303,8            | 0,0              | 3634,4           |
| 20       | 14359,8   | NE        | NE        | 1,0            | 40,6           | 44,6           | 42,0             | 23,8             | 749,0            |
| 21       | 18877,1   | 168,6     | 751,4     | 57,1           | 37,1           | 2,9            | 58,0             | 2,0              | 107,0            |
| 22       | 13312,4   | 59,1      | 388,9     | 1974,9         | 17,9           | 110,2          | 216,0            | 3,0              | 42,0             |
| 23       | 41397,5   | 327,5     | 235,0     | 45,0           | 57,5           | 0,0            | 266,5            | 0,0              | 51,2             |
| 24       | 12789,8   | 127,6     | 102,7     | 33,6           | 33,6           | 8,4            | 172,9            | 2,7              | 189,4            |
| 25       | 21136,9   | 130,7     | 1216,4    | 211,3          | 74,0           | 39,6           | 398,5            | 0,0              | 32,3             |
| 26       | 21927,2   | 44,9      | 118,9     | 208,7          | 73,8           | 22,9           | 221,1            | 0,0              | 29,5             |
| 27       | 17210,2   | NE        | NE        | 32,2           | 1239,0         | 21,0           | 2630,6           | 495,6            | 2039,8           |
| 28       | 58753,3   | 1320,7    | 634,7     | 538,8          | 59,4           | 182,4          | 2003,8           | 26,3             | 555,6            |
| 29       | 20706,3   | 93,3      | 1301,2    | 145,3          | 105,7          | 13,2           | NE               | NE               | NE               |
| 30       | 54311,3   | 55,4      | 58,3      | 83,5           | 70,0           | 18,8           | 0,0              | NE               | 22,4             |
| 31       | 23470,0   | 723,3     | 1970,0    | 140,0          | 0,0            | 524,0          | 776,0            | 8,0              | 228,0            |
| 32       | 21040,6   | 185,2     | 1142,6    | 144,4          | 564,4          | 13,1           | 61,3             | NE               | 30,6             |
| 33       | 27163,8   | 298,9     | 132,4     | 186,7          | 66,1           | 31,1           | 383,0            | 5,0              | 52,0             |
| 34       | 8534,4    | 184,8     | 250,6     | 700,0          | 600,6          | 484,4          | 295,4            | 470,4            | 1265,6           |
| 35       | 35923,1   | 735,0     | 21,9      | 173,9          | 72,1           | 135,8          | 704,4            | 91,9             | 411,3            |
| 36       | 37175,7   | 889,2     | 128,6     | 339,4          | 933,3          | 29,7           | 1282,6           | 18,1             | 180,6            |
| 37       | 50277,0   | 1098,8    | 509,1     | 1982,6         | 0,0            | 361,3          | 1255,5           | 4,5              | 121,9            |
| 38       | 66981,3   | 748,1     | 538,1     | 406,9          | 4,4            | 888,1          | 903,0            | 39,0             | 134,0            |
| 39       | 33642,8   | 2768,9    | 462,8     | 268,0          | 128,0          | 132,0          | 139,0            | 7,0              | 71,0             |
| 40       | 5880,0    | NE        | NE        | 32,2           | 298,2          | 18,2           | 95,2             | 200,2            | 1075,2           |
| 41       | 10476,2   | NE        | NE        | 23,8           | 2384,2         | 110,6          | 96,6             | 743,4            | 1790,6           |
| 42       | 35184,0   | 1004,0    | 168,0     | 20029,0        | 4,5            | 835,5          | 1625,8           | 13,5             | 171,6            |
| 43       | 72800,0   | 103,6     | 0,0       | 50,4           | 442,4          | 145,6          | 0,0              | 0,0              | 0,0              |
| 44       | 6300,0    | 114,8     | 95,2      | 5,6            | 450,8          | 176,4          | 29,4             | 0,0              | 1831,2           |
| 45       | 4474,4    | 371,0     | 712,6     | 42,0           | 565,6          | 225,4          | 0,0              | 0,0              | 670,6            |
| 46       | 41848,8   | 183,4     | 0,0       | 15169,0        | 70,0           | 452,2          | 329,0            | 371,0            | 991,2            |
| 47       | 8414,0    | NE        | NE        | 61,6           | 3950,8         | 61,6           | 1498,0           | 182,0            | 947,8            |
| 48       | 4495,4    | NE        | NE        | 9,8            | 63,0           | 116,2          | 0,0              | 78,4             | 586,6            |
| 49       | 24623,2   | 737,8     | 140,0     | 1125,6         | 420,0          | 103,6          | 308,0            | 453,6            | 1069,6           |
| 50       | 6445,6    | NE        | NE        | 32,2           | 379,4          | 18,2           | 151,2            | 537,6            | 1372,0           |
| 51       | 8423,8    | 274,4     | 155,4     | 15,4           | 320,6          | 15,4           | 100,8            | 4,2              | 1463,0           |
| 52       | 11060,0   | 70,0      | 218,4     | 2879,8         | 298,2          | 359,8          | 830,2            | 410,2            | 1162,0           |
| 53       | 4998,0    | NE        | NE        | 37,8           | 14,0           | 228,2          | 140,0            | 0,0              | 259,0            |
| 54       | 6456,8    | NE        | NE        | 16,8           | 673,4          | 53,2           | 119,0            | 361,2            | 618,8            |
| 55       | 37440,2   | NE        | NE        | 1087,8         | 345,8          | 0,0            | 28975,8          | 1642,2           | 798,0            |
| 56       | 7502,6    | NE        | NE        | 173,6          | 82,6           | 116,2          | 47,6             | 302,4            | 963,2            |
| 57       | 87080,0   | NE        | NE        | 471,8          | 42,0           | 0,0            | 1734,6           | 466,2            | 649,6            |
| 58       | 61833,8   | NE        | NE        | 110,6          | 148,4          | 50,4           | 721,0            | 292,6            | 1433,6           |
| 59       | 20808,2   | NE        | NE        | 36,4           | 358,4          | 67,2           | 1793,4           | 170,8            | 1114,4           |
| 60       | 8575,0    | 2452,8    | 974,4     | 274,4          | 168,0          | 39,2           | 565,6            | 536,2            | 156,8            |
| 61       | 7229,6    | NE        | NE        | 44,8           | 394,8          | 60,2           | 19,6             | 324,8            | 974,4            |
| 62       | 15773,8   | NE        | NE        | 0,0            | 3621,8         | 653,8          | 130,2            | 134,4            | 2006,2           |

|     |          |        |        |         |        |       |        |        |         |
|-----|----------|--------|--------|---------|--------|-------|--------|--------|---------|
| 63  | 6458,2   | NE     | NE     | 64,4    | 194,6  | 215,6 | 54,6   | 99,4   | 1521,8  |
| 64  | 7593,6   | NE     | NE     | 37,8    | 42,0   | 228,2 | 187,6  | 266,0  | 246,4   |
| 65  | 4054,4   | NE     | NE     | 5,6     | 1696,8 | 78,4  | 5,6    | 301,0  | 393,4   |
| 66  | 12507,0  | 204,4  | 116,2  | 128,8   | 1271,2 | 75,6  | 0,0    | 0,0    | 3309,6  |
| 67  | 6647,2   | NE     | NE     | 28,0    | 401,8  | 42,0  | 0,0    | 67,2   | 666,4   |
| 68  | 5938,8   | 151,2  | 26,6   | 16671,2 | 75,6   | 107,8 | 893,2  | 177,8  | 1519,0  |
| 69  | 4746,0   | 840,0  | 750,4  | 225,4   | 131,6  | 49,0  | 32,2   | 23,8   | 64,4    |
| 70  | 4312,0   | 179,2  | 28,0   | 256,2   | 597,8  | 84,0  | 126,0  | 65,8   | 60,2    |
| 71  | 6531,0   | 145,6  | 162,4  | 425,6   | 1276,8 | 749,0 | 441,0  | 312,2  | 898,8   |
| 72  | 34251,0  | 140,0  | 123,2  | 1873,2  | 93,8   | 315,0 | 140,0  | 529,2  | 383,6   |
| 73  | 6227,2   | 149,8  | 429,8  | 1031,8  | 1384,6 | 368,2 | 576,8  | 602,0  | 1047,2  |
| 74  | 33233,2  | 1486,8 | 5,6    | 487,2   | 358,4  | 28,0  | 315,0  | 280,0  | 810,6   |
| 75  | 14453,6  | 308,0  | 308,0  | 1528,8  | 140,0  | 390,6 | 140,0  | 380,8  | 453,6   |
| 76  | 3586,8   | 190,4  | 1209,6 | 1516,2  | 92,4   | 169,4 | 32,2   | 0,0    | 856,8   |
| 77  | 7683,2   | 78,4   | 67,2   | 403,2   | 296,8  | 705,6 | 145,6  | 224,0  | 515,2   |
| 78  | 4911,2   | 403,2  | 560,0  | 588,0   | 151,2  | 33,6  | 28,0   | 358,4  | 291,2   |
| 79  | 30794,4  | 945,0  | 239,4  | 33,6    | 1629,6 | 106,4 | 1860,6 | 0,0    | 359,8   |
| 80  | 6944,0   | 0,0    | 0,0    | 39,2    | 324,8  | 112,0 | 823,2  | 50,4   | 929,6   |
| 81  | 6036,8   | 151,2  | 16,8   | 16,8    | 145,6  | 78,4  | 49,0   | 0,0    | 43,4    |
| 82  | 6218,8   | 303,8  | 145,6  | 40,6    | 1173,2 | 116,2 | 653,8  | 245,0  | 2993,2  |
| 83  | 7044,8   | 358,4  | 36,4   | 70,0    | 350,0  | 70,0  | 28,0   | 0,0    | 89,6    |
| 84  | 12303,2  | 369,6  | 11,2   | 28,0    | 644,0  | 28,0  | 11,2   | 0,0    | 296,8   |
| 85  | 9434,6   | 800,8  | 39,2   | 218,4   | 280,0  | 151,2 | 5,6    | 0,0    | 127,4   |
| 86  | 21029,4  | 235,2  | 3040,8 | 18,2    | 5922,0 | 256,2 | 123,2  | 0,0    | 1276,8  |
| 87  | 19807,2  | 341,6  | 16,8   | 58,8    | 2613,8 | 70,0  | 61,6   | 5,6    | 12045,6 |
| 88  | 3585,4   | 383,6  | 67,2   | 53,2    | 840,0  | 204,4 | 25,2   | 0,0    | 830,2   |
| 89  | 12677,0  | 816,2  | 19,6   | 0,0     | 960,4  | 0,0   | 4494,0 | 2786,0 | 477,4   |
| 90  | 36563,8  | 473,2  | 390,6  | 11,2    | 1426,6 | 107,8 | 3859,8 | 4267,2 | 2623,6  |
| 91  | 14256,2  | 431,2  | 985,6  | 543,2   | 1370,6 | 180,6 | 263,2  | 309,4  | 980,0   |
| 92  | 21897,4  | 390,6  | 46,2   | 474,6   | 292,6  | 103,6 | 159,6  | 63,0   | 2310,0  |
| 93  | 434840,0 | 851,2  | 655,2  | 60,2    | 1010,8 | 231,0 | 226,8  | 172,2  | 1183,0  |
| 94  | 40152,0  | 583,8  | 72,8   | 72,8    | 609,0  | 189,0 | 2380,0 | 721,0  | 2107,0  |
| 95  | 14017,0  | 269,0  | 38,0   | 22,0    | 0,0    | 17,0  | 22,0   | 1092,0 | 1014,0  |
| 96  | 21056,0  | 140,0  | 39,2   | NE      | NE     | NE    | NE     | NE     | NE      |
| 97  | 17340,4  | NE     | NE     | 176,4   | 5362,0 | 228,2 | 932,4  | 67,2   | 1192,8  |
| 98  | 17936,8  | 1353,8 | 0,0    | 4986,8  | 116,2  | 110,6 | 296,8  | 215,6  | 554,4   |
| 99  | 13397,1  | 54,3   | 320,0  | 706,8   | 20,5   | 17,1  | 448,0  | 2,8    | 274,4   |
| 100 | 18900,0  | 106,4  | 75,6   | 91,8    | 23,0   | 9,2   | 55,0   | 0,0    | 15,0    |
| 101 | 17436,7  | 63,3   | 1260,0 | 336,0   | 91,0   | 37,3  | 330,6  | 0,0    | 181,7   |
| 102 | 19297,1  | 205,7  | 617,1  | 177,0   | 92,5   | 26,4  | 265,7  | 2,9    | 60,0    |
| 103 | 32660,4  | 130,7  | 706,2  | 105,0   | 55,4   | 8,8   | 336,0  | 0,0    | 158,7   |
| 104 | 8079,2   | 37,9   | 300,4  | 282,5   | 44,2   | 0,0   | 118,2  | 0,0    | 140,0   |
| 105 | 9126,3   | 40,8   | 449,2  | 23,8    | 32,8   | 0,0   | 422,9  | 0,0    | 331,4   |
| 106 | 12268,6  | 65,7   | 371,4  | 334,4   | 28,5   | 13,0  | 194,4  | 2,6    | 10,4    |

**Supplementary Table 6. EV concentrations in cancer patients at the first radiological evaluation.**

| Patients2 | Total EVs | Leuko EVs | CD31+ EVs | CD90+CD29- EVs | CD90-CD29+ EVs | CD90+CD29+ EVs | CD326-CD133+ EVs | CD326+CD133+ EVs | CD326+CD133- EVs |
|-----------|-----------|-----------|-----------|----------------|----------------|----------------|------------------|------------------|------------------|
| 1         | 24717,4   | 157,9     | 26,8      | 154,4          | 14,4           | 79,0           | 22,1             | 3,7              | 114,2            |
| 2         | 5126,8    | 123,2     | 33,6      | 78,4           | 173,6          | 22,4           | 58,8             | 198,8            | 180,6            |
| 3         | 41047,1   | 609,7     | 1336,8    | 325,2          | 194,2          | 58,7           | 1919,4           | 9,0              | 555,5            |
| 4         | 17288,5   | 143,0     | 190,6     | 243,9          | 45,2           | 45,2           | 2235,6           | 7,8              | 4,4              |
| 5         | 5185,6    | 186,2     | 595,0     | 243,6          | 1418,2         | 956,2          | 91,0             | 443,8            | 938,0            |
| 6         | 98744,0   | 452,0     | 88,0      | 261,9          | 1946,5         | 207,7          | 7225,8           | 31,6             | 672,9            |
| 7         | 41815,5   | 432,7     | 591,8     | 171,5          | 49,0           | 101,5          | 55,3             | 0,0              | 582,1            |
| 8         | 21807,3   | 592,7     | 65,3      | 318,6          | 67,6           | 111,0          | 1306,7           | 46,7             | 182,0            |
| 9         | 10147,2   | 604,8     | 39,2      | 16,8           | 420,0          | 134,4          | 0,0              | 0,0              | 677,6            |
| 10        | 27174,0   | 667,3     | 163,3     | 14161,9        | 4,4            | 183,8          | 1630,6           | 16,5             | 123,5            |
| 11        | 8545,6    | 560,0     | 35,0      | 21,0           | 1047,2         | 212,8          | 50,4             | 0,0              | 3354,4           |
| 12        | 12880,0   | 285,6     | 0,0       | 2391,2         | 649,6          | 252,0          | 61,6             | 1220,8           | 268,8            |
| 13        | 13756,4   | 306,6     | 289,8     | 317,8          | 123,2          | 32,2           | 60,2             | 292,6            | 371,0            |
| 14        | 11447,8   | 420,0     | 11,2      | 9,8            | 9825,2         | 29,4           | 5013,4           | 1443,4           | 291,2            |
| 15        | 12180,0   | 106,4     | 429,8     | 407,4          | 943,6          | 407,4          | 127,4            | 5,6              | 116,2            |
| 16        | 736442,0  | 851,2     | 655,2     | 60,2           | 1010,8         | 231,0          | 226,8            | 172,2            | 1183,0           |
| 17        | 9301,6    | 168,0     | 218,4     | 207,2          | 39,2           | 162,4          | 655,2            | 196,0            | 285,6            |
| 18        | 47050,8   | 236,9     | 825,6     | 228,0          | 160,0          | 68,0           | 8,0              | 0,0              | 49,0             |
| 19        | 20972,9   | 731,6     | 271,0     | 550,7          | 42,0           | 163,3          | 975,6            | 17,5             | 218,8            |
| 20        | 28446,3   | 161,9     | 83,1      | 189,7          | 45,2           | 58,7           | 709,0            | 0,0              | 144,5            |
| 21        | 40233,5   | 86,5      | 131,8     | 416,0          | 44,0           | 60,0           | 1111,5           | 8,5              | 343,6            |
| 22        | 7222,8    | 197,2     | 337,2     | 177,3          | 37,3           | 84,0           | 1502,9           | 8,2              | 366,5            |
| 23        | 4155,2    | NE        | NE        | 26,6           | 302,4          | 103,6          | 114,8            | 225,4            | 1030,4           |
| 24        | 41339,4   | 805,0     | 35,0      | 305,5          | 17,0           | 67,9           | 6549,0           | 0,0              | 0,0              |
| 25        | 60092,0   | 2216,0    | 232,0     | 313,9          | 178,2          | 63,6           | 2068,0           | 32,0             | 476,0            |
| 26        | 23788,0   | 156,0     | 244,0     | 272,0          | 29100,0        | 16,0           | 8,2              | 0,0              | 490,0            |
| 27        | 41499,4   | 182,4     | 207,9     | 120,6          | 46,7           | 38,9           | 582,6            | 13,5             | 329,7            |
| 28        | 18590,6   | 893,2     | 75,6      | 589,4          | 600,6          | 683,2          | 506,8            | 245,0            | 576,8            |
| 29        | 46592,9   | 1174,2    | 803,9     | 1045,6         | 4,4            | 266,9          | 1264,5           | 0,0              | 4,5              |
| 30        | 24717,4   | 157,9     | 801,3     | 154,4          | 14,4           | 79,0           | 22,1             | 3,7              | 114,2            |
| 31        | 40018,5   | 574,4     | 499,0     | 18375,0        | 4,4            | 577,5          | 250,0            | 4,0              | 36,0             |
| 32        | 9770,6    | NE        | NE        | 518,0          | 341,6          | 170,8          | 581,0            | 453,6            | 674,8            |
| 33        | 72461,2   | 2100,0    | 134,4     | 95,2           | 5936,0         | 117,6          | 21589,4          | 13008,8          | 2391,2           |
| 34        | 6666,8    | 247,8     | 159,6     | 12,6           | 505,4          | 182,0          | 0,0              | 0,0              | 1050,0           |
| 35        | 6440,0    | 736,4     | 23,8      | 54,6           | 554,4          | 140,0          | 0,0              | 0,0              | 408,8            |
| 36        | 20367,2   | NE        | NE        | 29,4           | 299,6          | 130,2          | 0,0              | 0,0              | 2374,4           |
| 37        | 2598,4    | 403,2     | 110,6     | 823,2          | 392,0          | 1349,6         | 56,0             | 100,8            | 313,6            |
| 38        | 16234,4   | 263,2     | 70,0      | 1540,0         | 1449,0         | 533,4          | 571,2            | 386,4            | 756,0            |
| 39        | 10260,6   | 159,6     | 379,4     | 497,0          | 2389,8         | 439,6          | 824,6            | 375,2            | 3925,6           |
| 40        | 8033,2    | NE        | NE        | 263,2          | 259,0          | 215,6          | 172,2            | 189,0            | 904,4            |
| 41        | 10438,4   | 0,0       | 70,0      | 791,0          | 33,6           | 12,6           | 568,4            | 49,0             | 511,0            |
| 42        | 25293,8   | 649,6     | 74,2      | 275,8          | 1429,4         | 110,6          | 109,2            | 606,2            | 1518,8           |
| 43        | 8703,8    | 1450,4    | 935,2     | 459,2          | 784,0          | 179,2          | 968,8            | 600,6            | 333,2            |
| 44        | 4799,2    | 350,0     | 320,6     | 793,8          | 665,0          | 1365,0         | 280,0            | 184,8            | 403,2            |
| 45        | 47320,0   | 0,0       | 4060,0    | 15,4           | 259,0          | 358,4          | 950,6            | 810,6            | 1094,8           |
| 46        | 243019,0  | 233,8     | 2205,0    | 344,4          | 2864,4         | 256,2          | 53,2             | 75,6             | 18652,2          |
| 47        | 7746,2    | 280,0     | 296,8     | 347,2          | 173,6          | 44,8           | 16,8             | 373,8            | 694,4            |
| 48        | 7070,0    | 89,6      | 50,4      | 487,2          | 197,4          | 498,4          | 576,8            | 198,8            | 548,8            |
| 49        | 15009,4   | 660,8     | 436,8     | 506,8          | 490,0          | 86,8           | 151,2            | 326,2            | 198,8            |
| 50        | 7576,8    | 175,0     | 29,0      | 576,8          | 274,4          | 326,2          | 99,4             | 274,4            | 105,0            |
| 51        | 4431,0    | 184,8     | 750,4     | 1058,4         | 1540,0         | 683,2          | 37,8             | 183,4            | 431,2            |
| 52        | 24262,0   | 520,8     | 33,6      | 75,6           | 1416,8         | 145,6          | 0,0              | 0,0              | 6890,8           |
| 53        | 7247,8    | 638,4     | 5,6       | 2424,8         | 1467,2         | 128,0          | 16,8             | 312,2            | 802,2            |
| 54        | 9850,4    | 840,0     | 140,0     | 85,4           | 1162,0         | 152,6          | 70,0             | 0,0              | 1820,0           |
| 55        | 4540,2    | 89,6      | 33,6      | 4,2            | 603,4          | 82,6           | 0,0              | 0,0              | 670,6            |
| 56        | 5758,2    | 268,8     | 70,0      | 46,2           | 2660,0         | 256,2          | 49,0             | 5,6              | 1460,2           |
| 57        | 47107,2   | 352,8     | 403,2     | 40,6           | 2088,8         | 75,6           | 1029,0           | 12,6             | 2361,8           |
| 58        | 14915,6   | 543,2     | 123,2     | 26,6           | 543,2          | 102,2          | 5,6              | 0,0              | 1631,0           |
| 59        | 97879,6   | 163,8     | 70,0      | 23,8           | 912,8          | 182,0          | 1800,4           | 4,2              | 5044,2           |
| 60        | 25695,6   | 723,8     | 23,8      | 49,0           | 361,2          | 210,0          | 134,4            | 301,0            | 1729,0           |
| 61        | 35302,4   | 767,2     | 95,2      | 70,0           | 2864,4         | 70,0           | 0,0              | 5,6              | 9514,4           |
| 62        | 67736,2   | 845,6     | 21,0      | 130,2          | 170,8          | 98,0           | 21425,6          | 8680,0           | 5331,2           |

|    |         |       |       |       |       |       |        |       |        |
|----|---------|-------|-------|-------|-------|-------|--------|-------|--------|
| 63 | 39991,0 | 655,2 | 102,2 | 207,2 | 389,2 | 378,0 | 2366,0 | 623,0 | 2219,0 |
| 64 | 29448,1 | 297,5 | 350,0 | 461,2 | 98,8  | 127,6 | 3593,3 | 17,0  | 2494,5 |
| 65 | 59416,6 | 229,4 | 95,3  | 437,0 | 17,0  | 114,5 | 5171,3 | 35,0  | 2340,6 |

**Supplementary Table 7. Variation of CD133+CD326- EV levels respect to the baseline concentration, evaluated according to the clinical benefit response.**

| <b>Group</b>                       | <b>Difference</b> | <b>Percentage %</b> | <b>Odd Ratio (CI 95%)</b> | <b>p-value (Fisher's exact test)</b> |
|------------------------------------|-------------------|---------------------|---------------------------|--------------------------------------|
| <b>Total cancer patient cohort</b> |                   |                     |                           |                                      |
| <b>Responders (n=48)</b>           | $\geq 0$          | 66.7 (n=32)         | 1.46 (1.04-2.05)          | <b>0.019</b>                         |
|                                    | $< 0$             | 33.3 (n=16)         |                           |                                      |
| <b>Non-Responders (n=16)</b>       | $\geq 0$          | 31.3 (n=5)          | 0.33 (0.13-0.84)          | <b>0.019</b>                         |
|                                    | $< 0$             | 68.8 (n=11)         |                           |                                      |
| <b>Lung Cancer</b>                 |                   |                     |                           |                                      |
| <b>Responders (n=20)</b>           | $\geq 0$          | 65.0 (n=13)         | 1.52 (0.70-15.1)          | 0.15                                 |
|                                    | $< 0$             | 35.0 (n=7)          |                           |                                      |
| <b>Non-Responders (n=11)</b>       | $\geq 0$          | 36.4 (n=4)          | 0.47 (0.17-1.29)          | 0.15                                 |
|                                    | $< 0$             | 63.6 (n=7)          |                           |                                      |



**Supplementary Table 8.** List of proteins identified in EV isolated from Healthy control subjects (8A) and from Lung cancer patients (8B).

**Supplementary Table 8A**

| Healthy Control |           |                  |                       |                                     |                   |        |                                              |
|-----------------|-----------|------------------|-----------------------|-------------------------------------|-------------------|--------|----------------------------------------------|
| Protein ID      | #Peptides | #Unique peptides | Sequence coverage [%] | PTM                                 | Mol. weight (kDa) | Score  | Description                                  |
| A0A0B4J2B5      | 1         | 1                | 19.4                  | Carbamidomethylation                | 10.657            | 9.3532 | Immunoglobulin heavy variable 3/OR16         |
| A6NMB1          | 1         | 1                | 1.5                   | Carbamidomethylation                | 52.991            | 7.26   | Sialic acid-binding Ig-like lectin 16        |
| O00338          | 1         | 1                | 4.1                   | Carbamidomethylation                | 34.88             | 6.5525 | Sulfotransferase 1C2                         |
| P00738          | 10        | 10               | 27.3                  | Carbamidomethylation, Oxidation (M) | 45.205            | 126.08 | Haptoglobin                                  |
| P00915          | 6         | 6                | 32.6                  | Carbamidomethylation                | 28.87             | 37.302 | Carbonic anhydrase 1                         |
| P00918          | 3         | 3                | 11.5                  | Carbamidomethylation                | 29.246            | 18.331 | Carbonic anhydrase 2                         |
| P01009          | 5         | 5                | 12.9                  | Carbamidomethylation                | 46.736            | 31.917 | Alpha-1-antitrypsin                          |
| P01023          | 18        | 18               | 14                    | Carbamidomethylation                | 163.29            | 125.89 | Alpha-2-macroglobulin                        |
| P01024          | 21        | 21               | 15.4                  | Carbamidomethylation                | 187.15            | 178.13 | Complement C3                                |
| P01834          | 2         | 2                | 34.6                  | Carbamidomethylation                | 11.765            | 18.095 | Ig kappa chain C region                      |
| P01857          | 8         | 3                | 28.8                  | Carbamidomethylation                | 36.105            | 25.922 | Ig gamma-1 chain C region                    |
| P01860          | 9         | 2                | 24.1                  | Carbamidomethylation                | 41.287            | 61.822 | Ig gamma-3 chain C region                    |
| P01871          | 7         | 7                | 18.3                  | Carbamidomethylation                | 49.439            | 58.845 | Ig mu chain C region                         |
| P01876          | 3         | 3                | 8.8                   | Carbamidomethylation                | 37.654            | 20.735 | Ig alpha-1 chain C region                    |
| P02042          | 6         | 2                | 38.1                  | Carbamidomethylation                | 16.055            | 31.214 | Hemoglobin subunit delta                     |
| P02647          | 7         | 7                | 29.2                  | Carbamidomethylation, Oxidation (M) | 30.777            | 52.296 | Apolipoprotein A-I                           |
| P02671          | 11        | 11               | 15.2                  | Carbamidomethylation                | 94.972            | 72.975 | Fibrinogen alpha chain                       |
| P02675          | 10        | 10               | 27.9                  | Carbamidomethylation                | 55.928            | 82.572 | Fibrinogen beta chain                        |
| P02679          | 6         | 6                | 14.3                  | Carbamidomethylation                | 51.511            | 40.592 | Fibrinogen gamma chain                       |
| P02751          | 1         | 1                | 0.5                   | Carbamidomethylation                | 262.62            | 7.1743 | Fibronectin                                  |
| P02763          | 3         | 2                | 15.9                  | Carbamidomethylation                | 23.511            | 18.42  | Alpha-1-acid glycoprotein 1                  |
| P02765          | 2         | 2                | 6.5                   | Carbamidomethylation                | 39.34             | 34.259 | Alpha-2-HS-glycoprotein                      |
| P02766          | 1         | 1                | 8.8                   | Carbamidomethylation                | 15.887            | 6.5995 | Transthyretin                                |
| P02768          | 40        | 35               | 53                    | Carbamidomethylation, Oxidation (M) | 69.366            | 323.31 | Serum albumin                                |
| P02787          | 24        | 24               | 35.7                  | Carbamidomethylation, Oxidation (M) | 77.063            | 248.25 | Serotransferrin                              |
| P02790          | 3         | 3                | 6.3                   | Carbamidomethylation                | 51.676            | 18.785 | Hemopexin                                    |
| P04040          | 2         | 2                | 5.3                   | Carbamidomethylation                | 59.755            | 13.433 | Catalase                                     |
| P04114          | 1         | 1                | 0.2                   | Carbamidomethylation                | 515.6             | 6.5645 | Apolipoprotein B-100                         |
| P04406          | 2         | 2                | 9.6                   | Carbamidomethylation                | 36.053            | 11.604 | Glyceraldehyde-3-phosphate dehydrogenase     |
| P05109          | 1         | 1                | 11.8                  | Carbamidomethylation                | 10.834            | 8.5403 | Protein S100-A8                              |
| P05155          | 2         | 2                | 3.6                   | Carbamidomethylation                | 55.154            | 11.908 | Plasma protease C1 inhibitor                 |
| POCOL5          | 3         | 3                | 2.2                   | Carbamidomethylation                | 192.75            | 18.845 | Complement C4-B                              |
| P0DOY3          | 3         | 3                | 31.1                  | Carbamidomethylation                | 11.265            | 19.978 | Ig lambda-1 chain C regions                  |
| P0DP03          | 2         | 2                | 18.8                  | Carbamidomethylation                | 12.947            | 13.858 | Ig heavy chain V-III region CAM              |
| P14923          | 4         | 4                | 7.8                   | Carbamidomethylation                | 81.744            | 25.276 | Junction plakoglobin                         |
| P19652          | 2         | 1                | 8.5                   | Carbamidomethylation                | 23.602            | 6.5307 | Alpha-1-acid glycoprotein 2                  |
| P19823          | 1         | 1                | 1.2                   | Carbamidomethylation                | 106.46            | 6.4399 | Inter-alpha-trypsin inhibitor heavy chain H2 |
| P25311          | 1         | 1                | 3.4                   | Carbamidomethylation                | 34.258            | 6.61   | Zinc-alpha-2-glycoprotein                    |
| P32119          | 4         | 4                | 18.2                  | Carbamidomethylation                | 21.892            | 24.321 | Peroxiredoxin-2                              |
| P63261          | 8         | 2                | 20.5                  | Carbamidomethylation                | 41.792            | 57.245 | Actin, cytoplasmic 2                         |
| P68871          | 7         | 3                | 46.9                  | Carbamidomethylation                | 15.998            | 98.447 | Hemoglobin subunit beta                      |
| P69905          | 6         | 6                | 42.3                  | Carbamidomethylation, Oxidation (M) | 15.257            | 60.639 | Hemoglobin subunit alpha                     |
| P81605          | 3         | 3                | 22.7                  | Carbamidomethylation                | 11.284            | 18.546 | Dermcidin                                    |
| Q5D862          | 1         | 1                | 0.5                   | Carbamidomethylation                | 248.07            | 7.6741 | Filaggrin-2                                  |
| Q5T749          | 6         | 6                | 10.4                  | Carbamidomethylation                | 64.135            | 41.99  | Keratinocyte proline-rich protein            |
| Q5VTE0          | 3         | 3                | 7.1                   | Carbamidomethylation                | 50.184            | 19.062 | Putative elongation factor 1-alpha-like 3    |
| Q86Y23          | 6         | 6                | 7.8                   | Carbamidomethylation                | 282.39            | 39.137 | Hornerin                                     |
| Q8NE71          | 2         | 2                | 2.1                   | Carbamidomethylation                | 95.925            | 11.39  | ATP-binding cassette sub-family F member 1   |

Supplementary Table 8B

| Lung Cancer |           |                  |                       |                                     |                   |        |                                            |
|-------------|-----------|------------------|-----------------------|-------------------------------------|-------------------|--------|--------------------------------------------|
| Protein ID  | #Peptides | #Unique peptides | Sequence coverage [%] | PTM                                 | Mol. weight (kDa) | Score  | Description                                |
| P00738      | 10        | 10               | 27.3                  | Carbamidomethylation, Oxidation (M) | 45.205            | 126.08 | Haptoglobin                                |
| P00915      | 6         | 6                | 32.6                  | Carbamidomethylation                | 28.87             | 37.302 | Carbonic anhydrase 1                       |
| P01009      | 5         | 5                | 12.9                  | Carbamidomethylation                | 46.736            | 31.917 | Alpha-1-antitrypsin                        |
| P01023      | 18        | 18               | 14                    | Carbamidomethylation                | 163.29            | 125.89 | Alpha-2-macroglobulin                      |
| P01024      | 21        | 21               | 15.4                  | Carbamidomethylation                | 187.15            | 178.13 | Complement C3                              |
| P01834      | 2         | 2                | 34.6                  | Carbamidomethylation                | 11.765            | 18.095 | Ig kappa chain C region                    |
| P01857      | 8         | 3                | 28.8                  | Carbamidomethylation                | 36.105            | 25.922 | Ig gamma-1 chain C region                  |
| P01860      | 9         | 2                | 24.1                  | Carbamidomethylation                | 41.287            | 61.822 | Ig gamma-3 chain C region                  |
| P01871      | 7         | 7                | 18.3                  | Carbamidomethylation                | 49.439            | 58.845 | Ig mu chain C region                       |
| P01876      | 3         | 3                | 8.8                   | Carbamidomethylation                | 37.654            | 20.735 | Ig alpha-1 chain C region                  |
| P02647      | 7         | 7                | 29.2                  | Carbamidomethylation, Oxidation (M) | 30.777            | 52.296 | Apolipoprotein A-I                         |
| P02671      | 11        | 11               | 15.2                  | Carbamidomethylation                | 94.972            | 72.975 | Fibrinogen alpha chain                     |
| P02675      | 10        | 10               | 27.9                  | Carbamidomethylation                | 55.928            | 82.572 | Fibrinogen beta chain                      |
| P02679      | 6         | 6                | 14.3                  | Carbamidomethylation                | 51.511            | 40.592 | Fibrinogen gamma chain                     |
| P02763      | 3         | 2                | 15.9                  | Carbamidomethylation                | 23.511            | 18.42  | Alpha-1-acid glycoprotein 1                |
| P02766      | 1         | 1                | 8.8                   | Carbamidomethylation                | 15.887            | 6.5995 | Transthyretin                              |
| P02768      | 40        | 35               | 53                    | Carbamidomethylation, Oxidation (M) | 69.366            | 323.31 | Serum albumin                              |
| P02787      | 24        | 24               | 35.7                  | Carbamidomethylation, Oxidation (M) | 77.063            | 248.25 | Serotransferrin                            |
| P02790      | 3         | 3                | 6.3                   | Carbamidomethylation                | 51.676            | 18.785 | Hemopexin                                  |
| P04406      | 2         | 2                | 9.6                   | Carbamidomethylation                | 36.053            | 11.604 | Glyceraldehyde-3-phosphate dehydrogenase   |
| P05109      | 1         | 1                | 11.8                  | Carbamidomethylation                | 10.834            | 8.5403 | Protein S100-A8                            |
| P07355      | 3         | 3                | 8.8                   | Carbamidomethylation                | 38.604            | 18.474 | Annexin A2                                 |
| P0DOY3      | 3         | 3                | 31.1                  | Carbamidomethylation                | 11.265            | 19.978 | Ig lambda-1 chain C regions                |
| P0DP03      | 2         | 2                | 18.8                  | Carbamidomethylation                | 12.947            | 13.858 | Ig heavy chain V-III region CAM            |
| P14923      | 4         | 4                | 7.8                   | Carbamidomethylation                | 81.744            | 25.276 | Junction plakoglobin                       |
| P15924      | 7         | 7                | 2.4                   | Carbamidomethylation                | 331.77            | 46.43  | Desmoplakin                                |
| P19652      | 2         | 1                | 8.5                   | Carbamidomethylation                | 23.602            | 6.5307 | Alpha-1-acid glycoprotein 2                |
| P25311      | 1         | 1                | 3.4                   | Carbamidomethylation                | 34.258            | 6.61   | Zinc-alpha-2-glycoprotein                  |
| P32119      | 4         | 4                | 18.2                  | Carbamidomethylation                | 21.892            | 24.321 | Peroxiredoxin-2                            |
| P35326      | 2         | 2                | 43.1                  | Carbamidomethylation                | 7.9653            | 15.62  | Small proline-rich protein 2A              |
| P63261      | 8         | 2                | 20.5                  | Carbamidomethylation                | 41.792            | 57.245 | Actin, cytoplasmic 2                       |
| P68871      | 7         | 3                | 46.9                  | Carbamidomethylation                | 15.998            | 98.447 | Hemoglobin subunit beta                    |
| P69905      | 6         | 6                | 42.3                  | Carbamidomethylation, Oxidation (M) | 15.257            | 60.639 | Hemoglobin subunit alpha                   |
| P81605      | 3         | 3                | 22.7                  | Carbamidomethylation                | 11.284            | 18.546 | Dermcidin                                  |
| Q02413      | 4         | 4                | 4.8                   | Carbamidomethylation                | 113.75            | 23.733 | Desmoglein-1                               |
| Q08554      | 3         | 3                | 3.9                   | Carbamidomethylation                | 99.986            | 17.977 | Desmocollin-1                              |
| Q5D862      | 1         | 1                | 0.5                   | Carbamidomethylation                | 248.07            | 7.6741 | Filaggrin-2                                |
| Q5T749      | 6         | 6                | 10.4                  | Carbamidomethylation                | 64.135            | 41.99  | Keratinocyte proline-rich protein          |
| Q5VTE0      | 3         | 3                | 7.1                   | Carbamidomethylation                | 50.184            | 19.062 | Putative elongation factor 1-alpha-like 3  |
| Q86YZ3      | 6         | 6                | 7.8                   | Carbamidomethylation                | 282.39            | 39.137 | Hornerin                                   |
| Q8NE71      | 2         | 2                | 2.1                   | Carbamidomethylation                | 95.925            | 11.39  | ATP-binding cassette sub-family F member 1 |
| Q96RW7      | 2         | 2                | 0.4                   | Carbamidomethylation                | 613.38            | 12.113 | Hemicentin-1                               |

**PANEL 1**

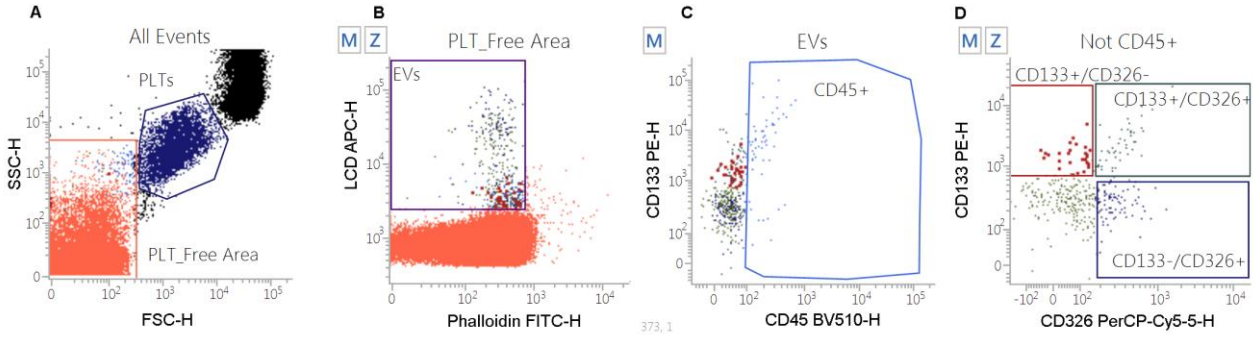

**PANEL 2**

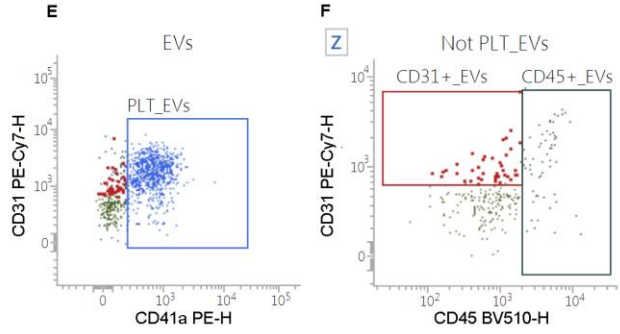

**PANEL 3**

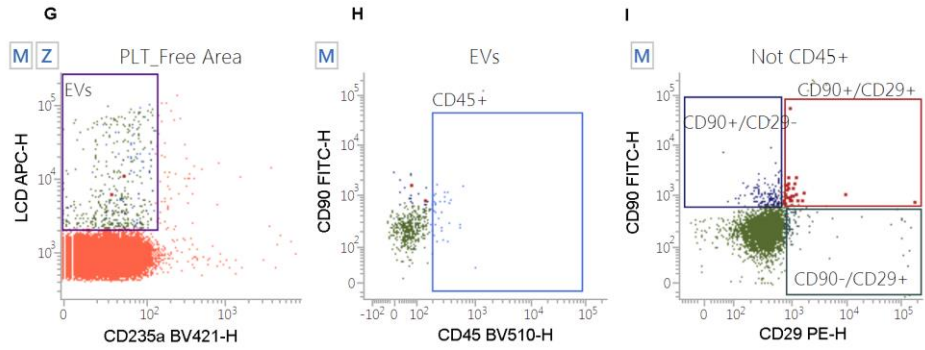

### **Supplementary Figure 1**

**Panel 1. A.** A region (“platelet free area”) under the one in which platelets (PLTs) fall was drawn on a SSC-H/FSC-H dot-plot. **B.** The “platelet free area” events were then represented on an LCD-H/Phalloidin-H dot-plot and EVs were identified as LCD positive/phalloidin negative dots. **C.** EVs (LCD+/Phalloidin- events) were analysed on a CD45-H/CD133-H dot-plot and CD45+ events were gated; a CD45 negative logical gate was then set and the resulting population was plotted on a **(D)** CD326-H/CD133-H dot-plot, where CD133+/CD326-, CD133+/CD326+, CD133-/CD326+ EVs were identified. **Panel 2. E.** EVs identified as shown in **A-B** were represented on a CD31-H/CD41a-H dot-plot, and events showing the CD31+/CD41a+ phenotype were identified as platelet-derived EVs (PLT-EVs); a PLT-EVs negative logical gate was set. **F.** The PLT-EV negative population was plotted on a CD45-H/CD31-H dot-plot, and CD45+ events were identified as leukocyte-derived EVs, while the CD31+/CD45- compartment was defined as the endothelial-derived EV population. **Panel 3. G.** The “platelet free area” events were identified as described in A, and then represented on an LCD-H/CD235a-H dot-plot; EVs were identified as LCD positive/CD235a negative dots. **H.** Those events were analysed on a CD45-H/CD90-H dot-plot and CD45+ events were gated. A CD45 negative logical gate was set. **I.** The resulting population was plotted on a CD29-H/CD90-H dot-plot, where CD90+/CD29-, CD90+/CD29+, and CD90-/CD29+ EVs were identified.

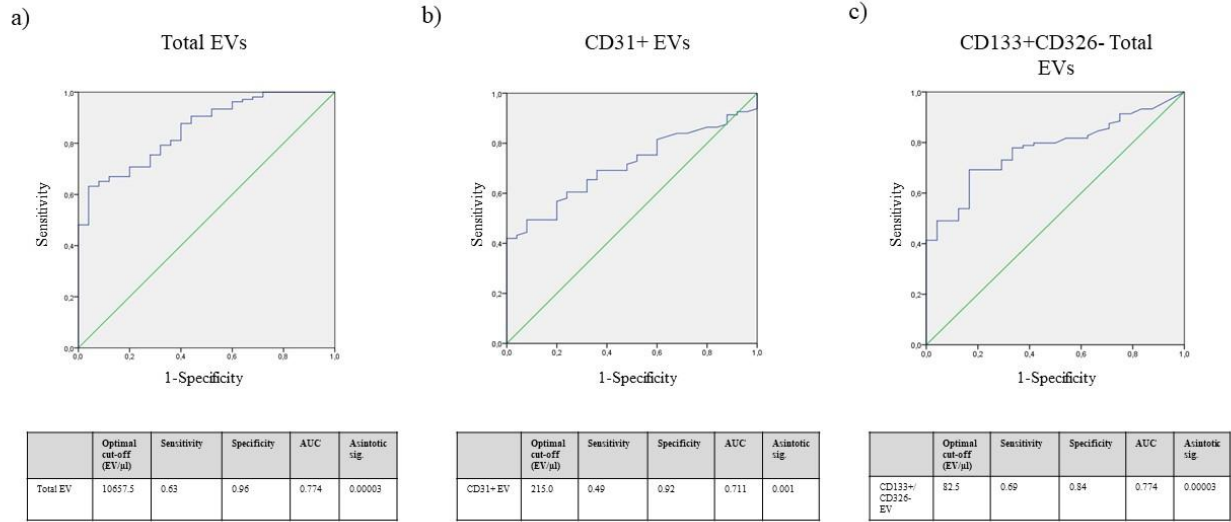

**Supplementary Figure 2.** ROC curves were calculated to determine the power of Total EV (a), CD31+ EV (b) and CD133+CD326- EV (c) concentrations as a discriminator of patients and healthy volunteers.

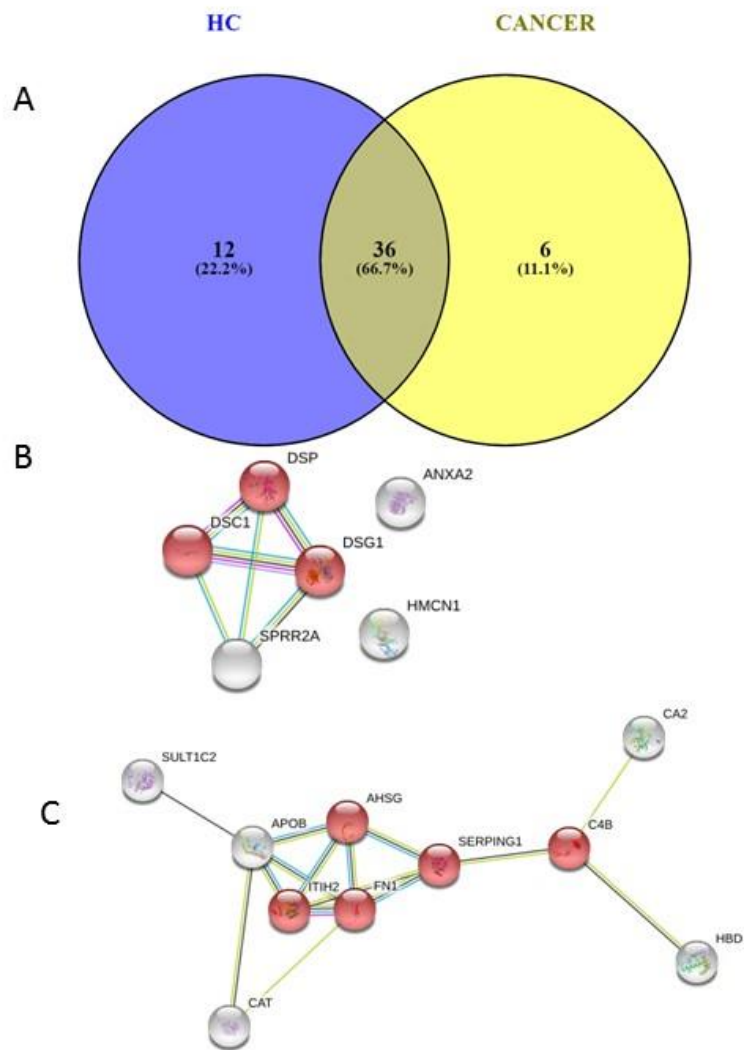

**Supplementary Figure 3.** A) Venn diagram of the identified proteins in Healthy Control (HC) pooled EVs and in lung cancer pooled EVs. B) Three of the six proteins (reported as red dots) identified only in cancer EVs resulted associated to the “cell-cell adhesion” process ( $p = 0.0023$ ). C) Ten proteins identified only in EVs from healthy volunteers resulted related to the “regulation of peptidase activity” (GO:0052547).
